# Supplementary material for: The variability of methane, nitrous oxide and sulfur hexafluoride in Northeast India
Source: Copernicus journal article supplement (doi:10.5194/acp-13-10633-2013), 2013-11-04
Supplement: Supplementary file 2 [file acp-13-10633-2013-supplement.zip]

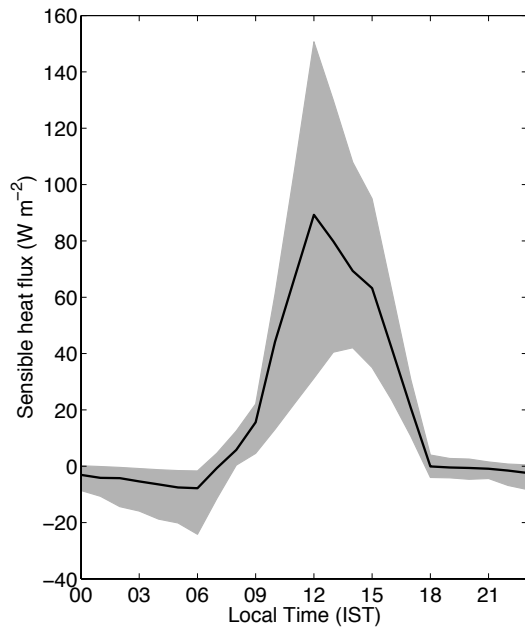

(a) January

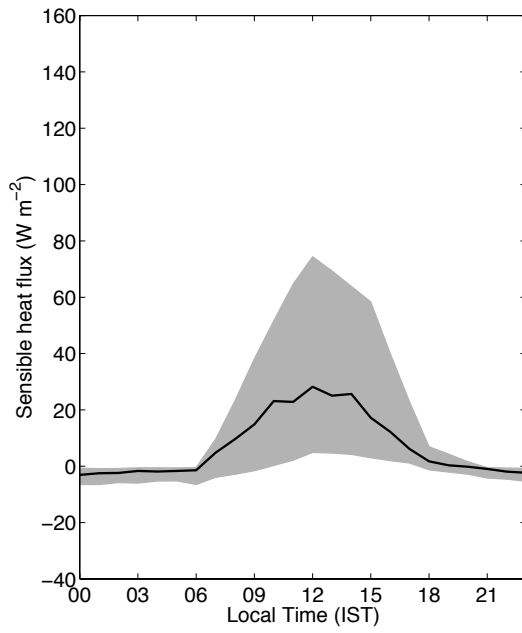

(b) July

Figure 1: Median diurnal sensible heat flux from the Unified Model for (a) January 2012 (b) July 2012. Shading indicates the 16th and 84th percentiles from each month.
