# Supplementary material for: The variability of methane, nitrous oxide and sulfur hexafluoride in Northeast India
Source: Copernicus journal article supplement (doi:10.5194/acp-13-10633-2013), 2013-11-04
Supplement: Supplementary file 3 [file acp-13-10633-2013-supplement.zip]

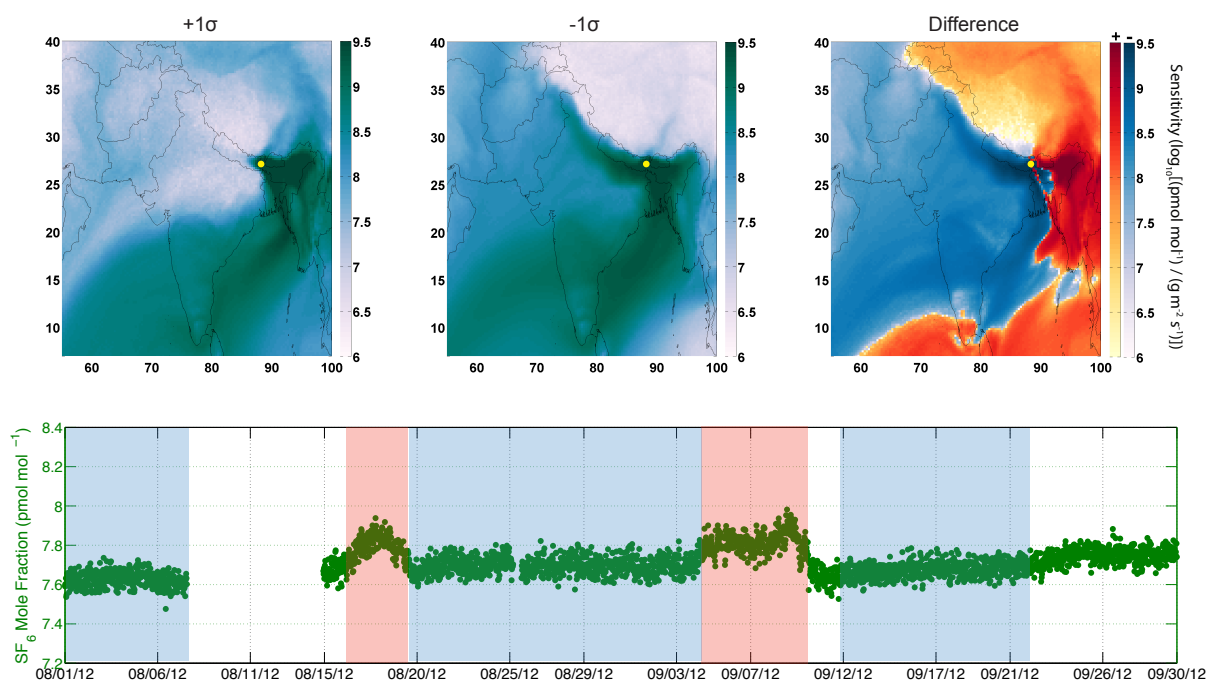

Figure 1: (Top) Average air histories from Darjeeling (yellow dot) corresponding to SF<sub>6</sub> measurements from August to September 2012 that are  $1\sigma$  above the mean of the period after smoothing (top, left), measurements that are  $1\sigma$  below the mean after smoothing (top, middle) and the difference between the two (top, right). The difference map is shown using two colormaps representing the log value of positive differences and negative differences, respectively. (Bottom) Mole fractions (unsmoothed) from the period are shown along with highlighted portions corresponding to the  $+1\sigma$  (red) and  $-1\sigma$  (blue) measurements after smoothing.
