# Supplementary material for: The variability of methane, nitrous oxide and sulfur hexafluoride in Northeast India
Source: Copernicus journal article supplement (doi:10.5194/acp-13-10633-2013), 2013-11-04
Supplement: Supplementary file 4 [file acp-13-10633-2013-supplement.zip]

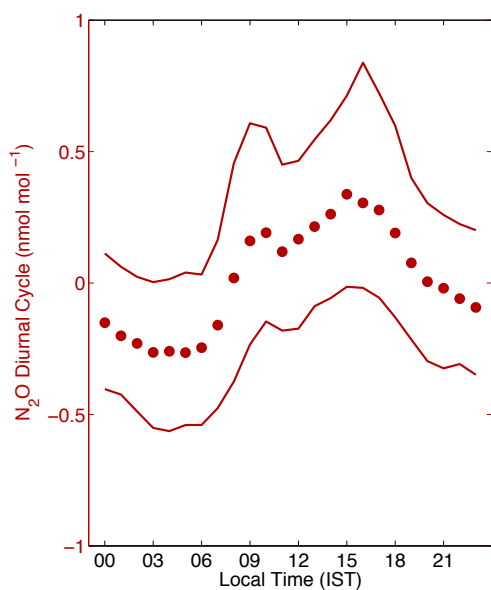

(a) Winter

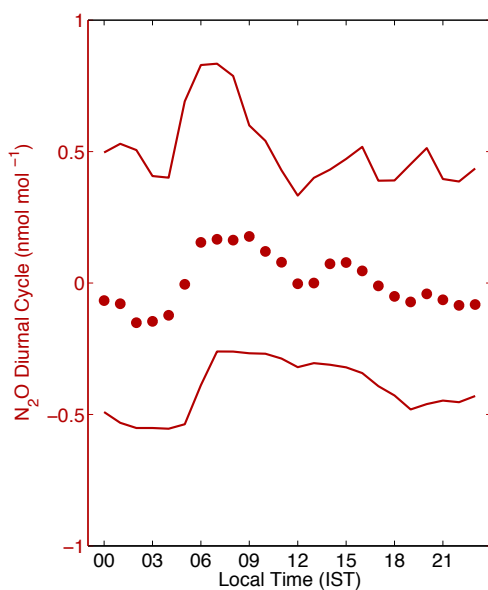

(b) Summer

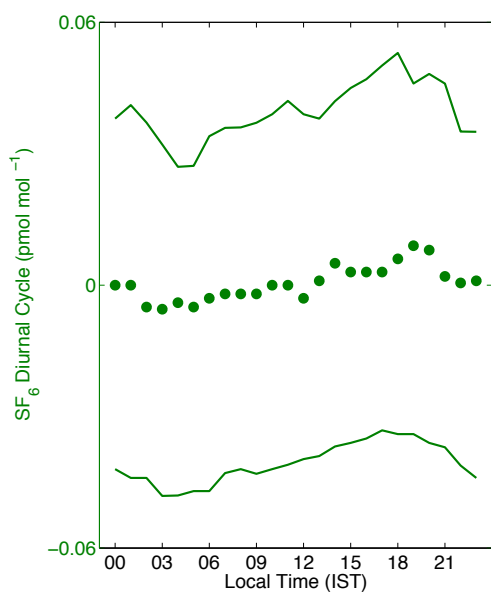

(c) Winter

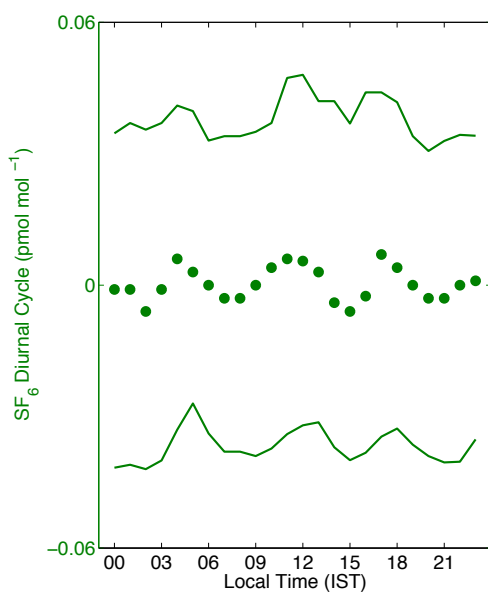

(d) Summer

Figure 1: Median observed diurnal cycles (circles) from (a) December 2012 - February 2013 for  $\text{N}_2\text{O}$  (b) June - August 2012 for  $\text{N}_2\text{O}$  (c) December 2012 - February 2013 for  $\text{SF}_6$  and (d) June - August 2012 for  $\text{SF}_6$ . Solid lines indicate the 16th and 84th percentiles from each period.
