# Supplementary material for: The variability of methane, nitrous oxide and sulfur hexafluoride in Northeast India
Source: Copernicus journal article supplement (doi:10.5194/acp-13-10633-2013), 2013-11-04
Supplement: Supplementary file 5 [file acp-13-10633-2013-supplement.zip]

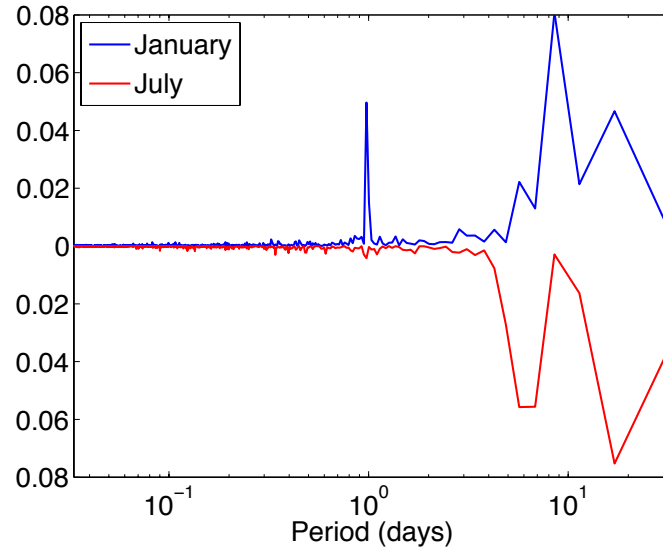

(a)  $\text{N}_2\text{O}$

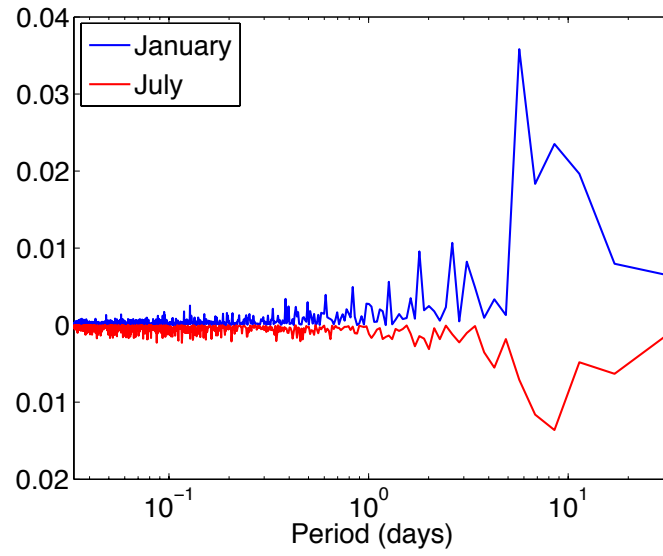

(b)  $\text{SF}_6$

Figure 1: Power spectrum of January 2013 (blue) and July 2012 (red) mole fractions normalized by the total of each month. July is shown as a mirror for visualization. (a)  $\text{N}_2\text{O}$  (b)  $\text{SF}_6$
