# Supplementary material for: The variability of methane, nitrous oxide and sulfur hexafluoride in Northeast India
Source: Copernicus journal article supplement (doi:10.5194/acp-13-10633-2013), 2013-11-04
Supplement: Supplementary file 6 [file acp-13-10633-2013-supplement.zip]

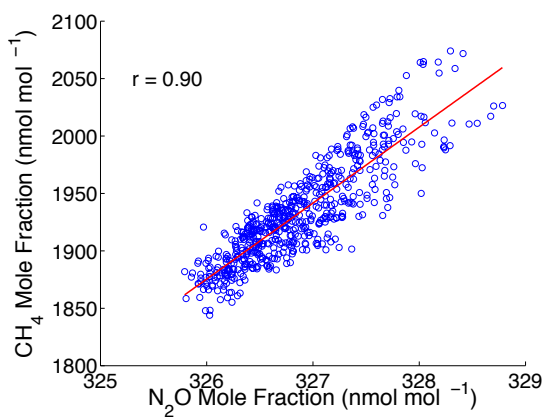

(a) Winter

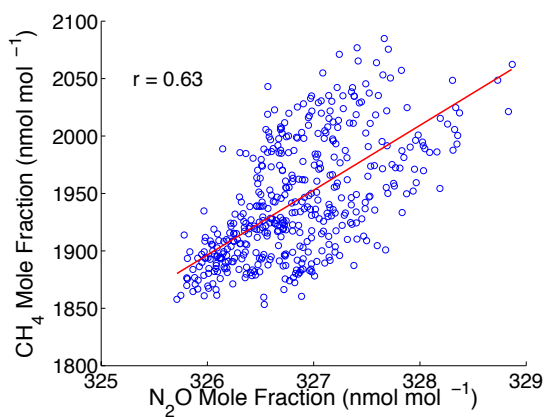

(b) Summer

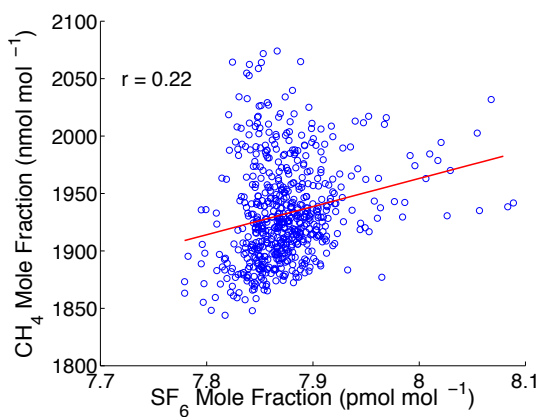

(c) Winter

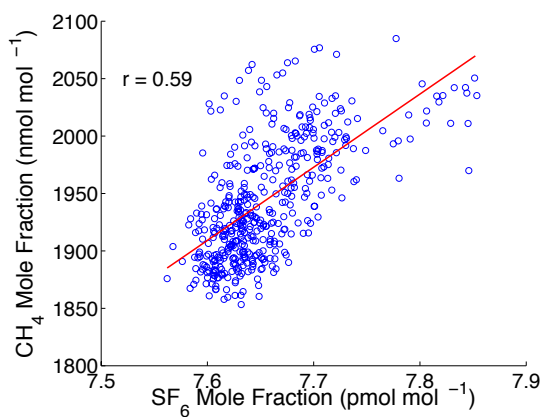

(d) Summer

Figure 1: Scatter plots showing correlations of (a)  $\text{CH}_4$  and  $\text{N}_2\text{O}$  from December 2012 through February 2013 (b)  $\text{CH}_4$  and  $\text{N}_2\text{O}$  from June 2012 through August 2012 (c)  $\text{CH}_4$  and  $\text{SF}_6$  from December 2012 through February 2013 (d)  $\text{CH}_4$  and  $\text{SF}_6$  from June 2012 through August 2012. All correlations are significant at the 95% level according to a t-test.
